# Supplementary material for: Mekong delta much lower than previously assumed in sea-level rise impact assessments
Source: PubMed Central journal article supplement (PMC6713785; doi:10.1038/s41467-019-11602-1), 2019-08-28
Supplement: 41467_2019_11602_MOESM1_ESM.pdf [file 41467_2019_11602_MOESM1_ESM.pdf]

Supplementary Information for

**Mekong delta much lower than previously assumed in sea-level rise impact assessments**

Minderhoud et al.

## Supplementary Figures

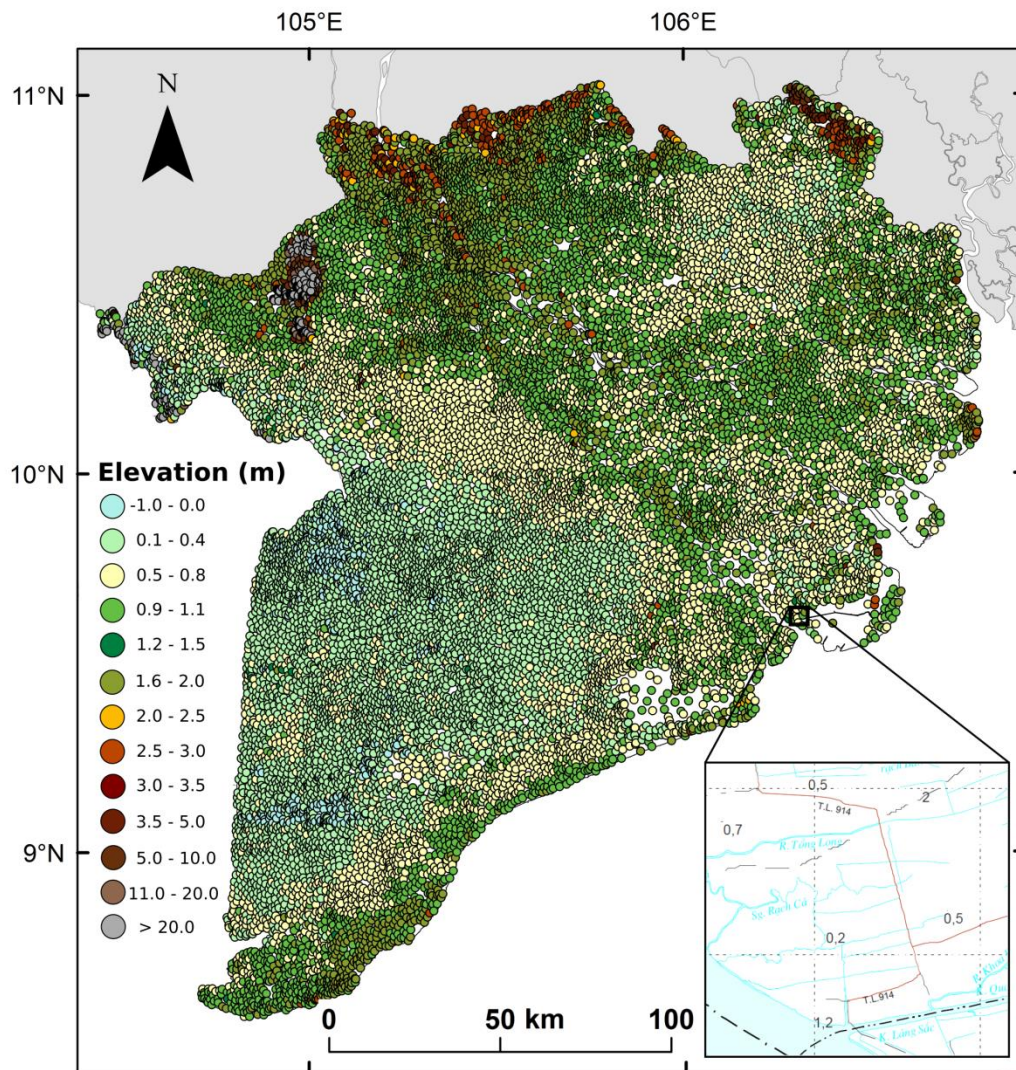

**Supplementary Figure 1 | Elevation points used to create the topographical (Topo) DEM.** The dataset contains almost 20,000 points derived from a national digital topographical map by the Department of Survey and Mapping of Vietnam (2014).

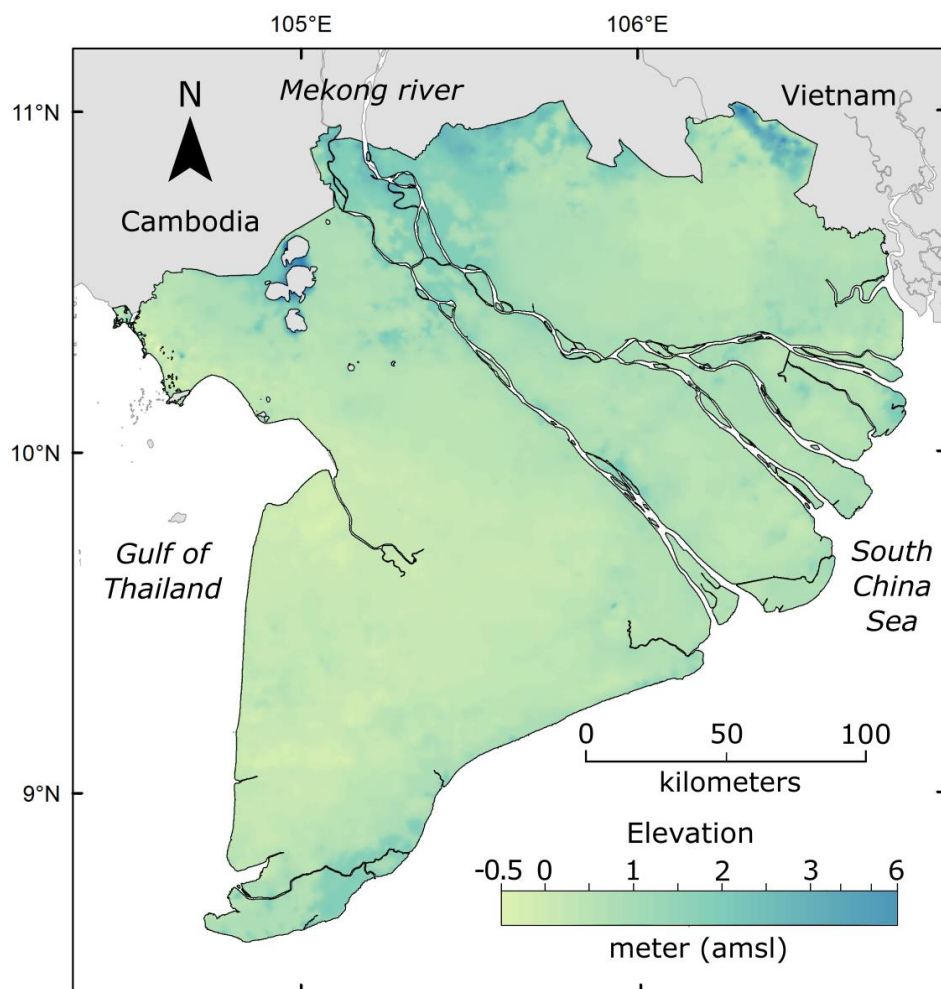

**Supplementary Figure 2 | Topo Digital Elevation Model.** Similar to Figure 2 in the main manuscript with alternative colour legend to accommodate for colour-blind readers.

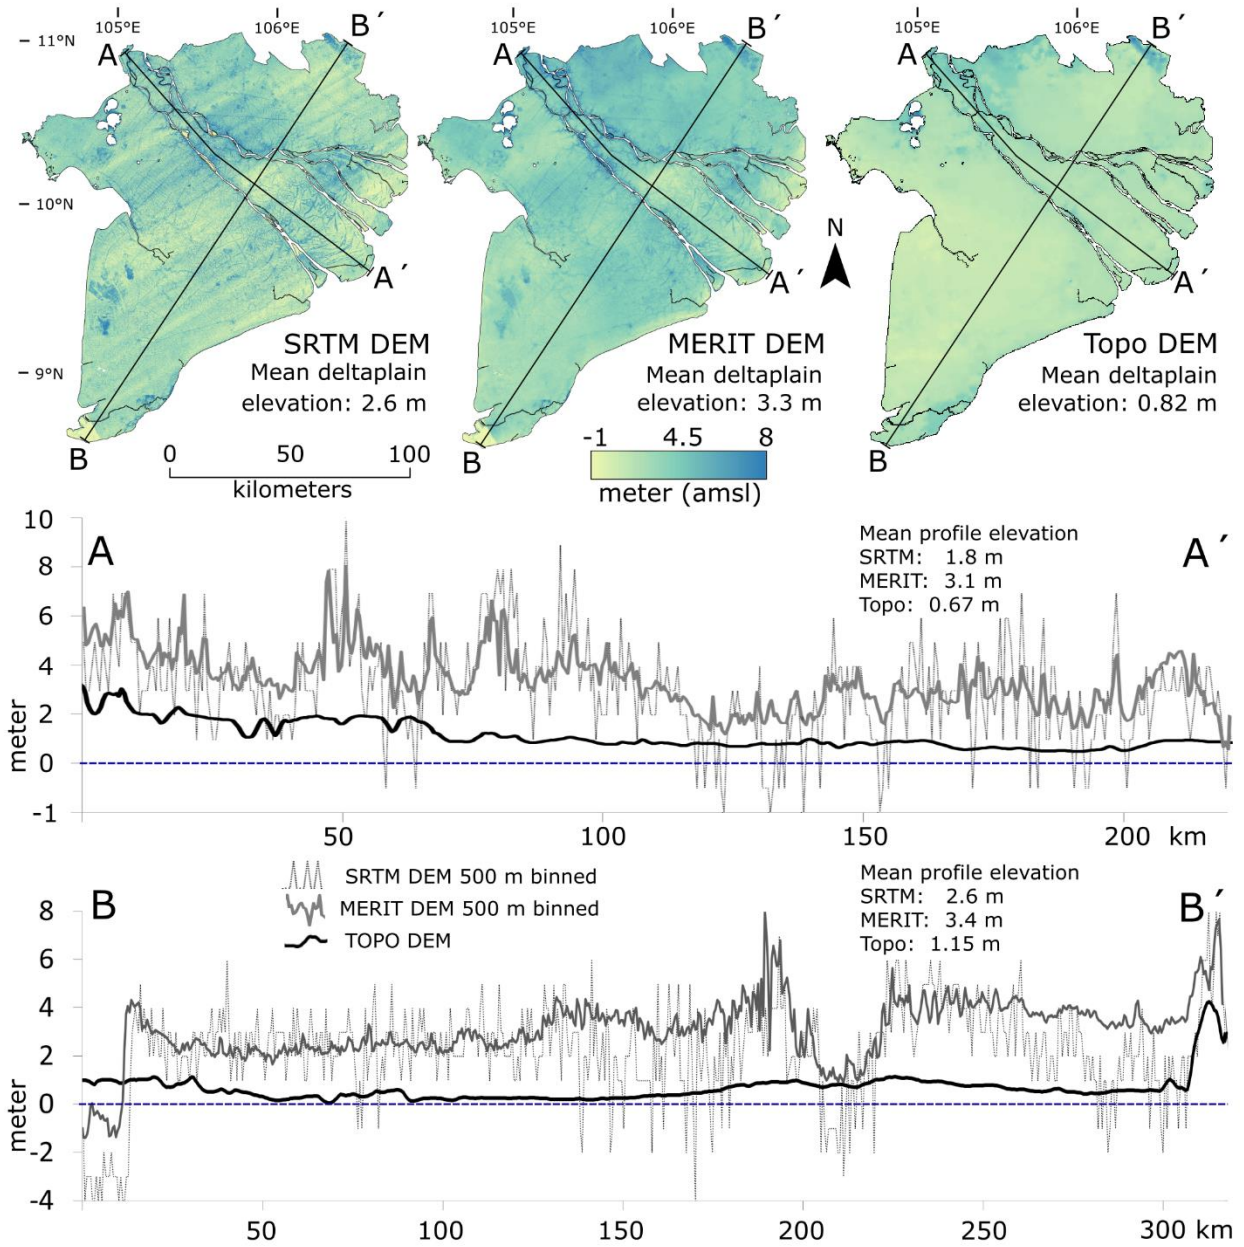

**Supplementary Figure 3 | Digital elevation models of the Mekong delta with elevation profiles.** Similar to Figure 3 in the main manuscript with alternative colour legend to accommodate for colour-blind readers.



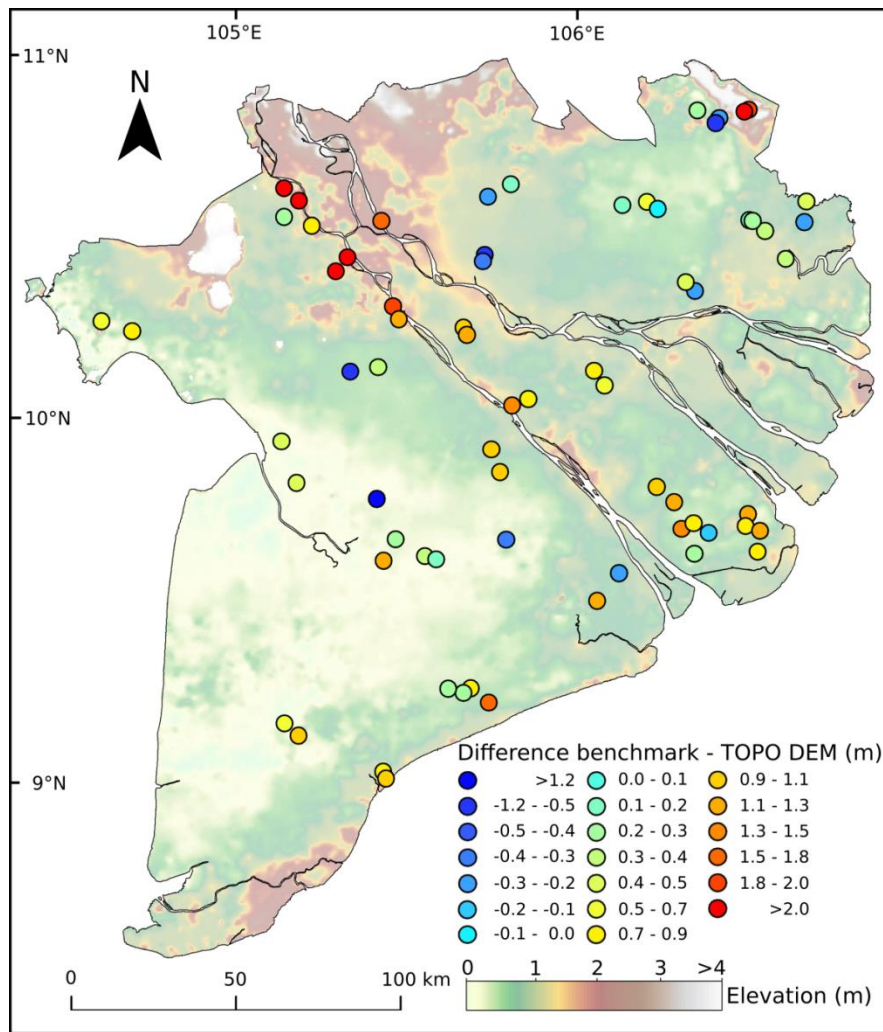

**Supplementary Figure 4 | Deviation between independent elevation benchmarks and Topo DEM.** Positive values indicate that the benchmark elevation is larger than the Topo DEM elevation.

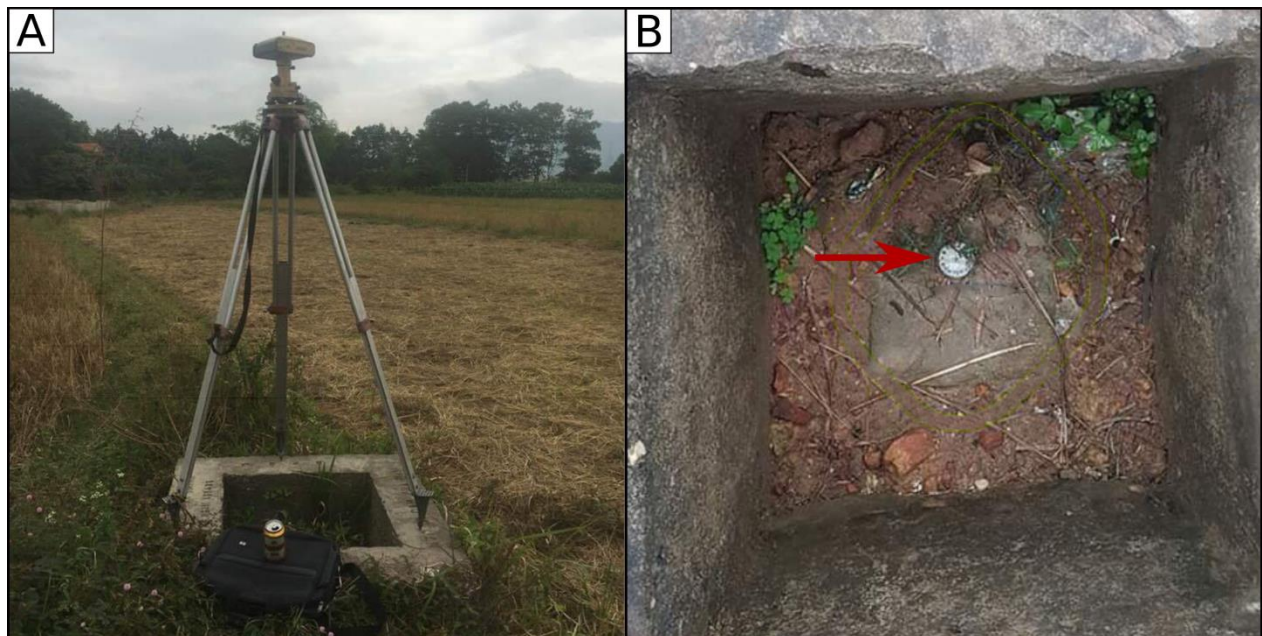

**Supplementary Figure 5 | Photographs of national benchmarks in Vietnam.** A) Leveling survey in practice to measure the position of a benchmark showing the concrete structure protecting the benchmark. B) Benchmark marker. The markers are installed reportedly 30 cm below the surrounding surface elevation and a larger concrete structure is constructed around the marker for protection.

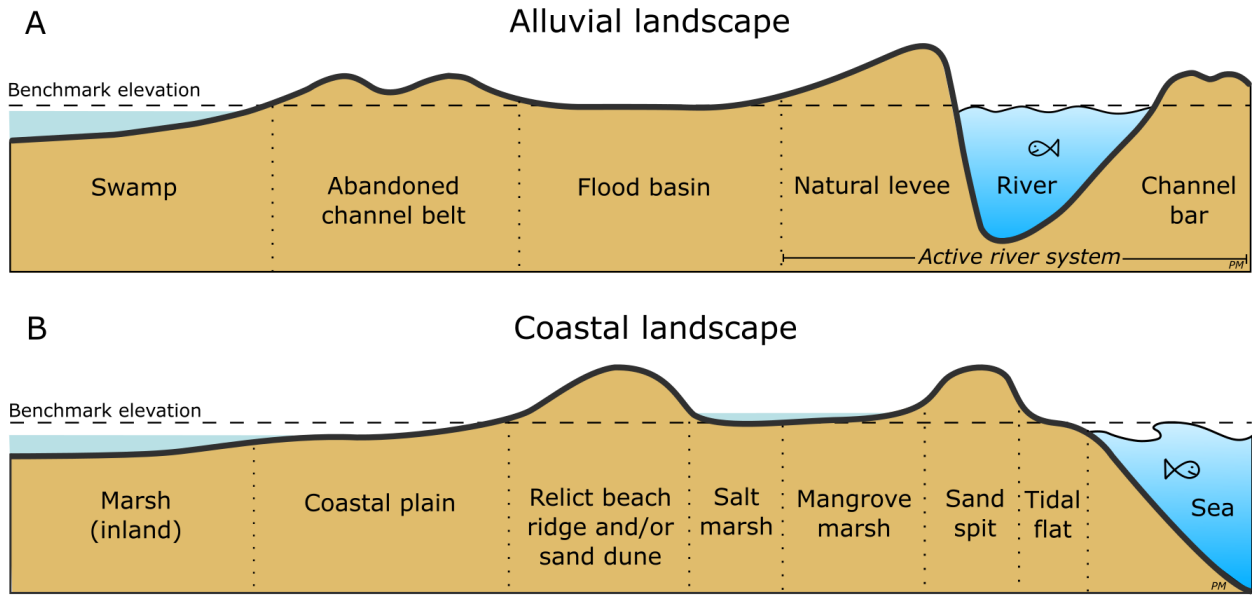

**Supplementary Figure 6 | Schematic profiles with geomorphological units of the alluvial and coastal landscapes**

**in the Mekong delta showing their relative elevation.** The alluvial landscape (A) is representative for the Upper delta plain and the coastal landscape (B) for the Lower delta plain of the delta. The dashed horizontal line represents a benchmark elevation of the flood basin and the tidal flat for the relative elevation comparison of each geomorphological unit.

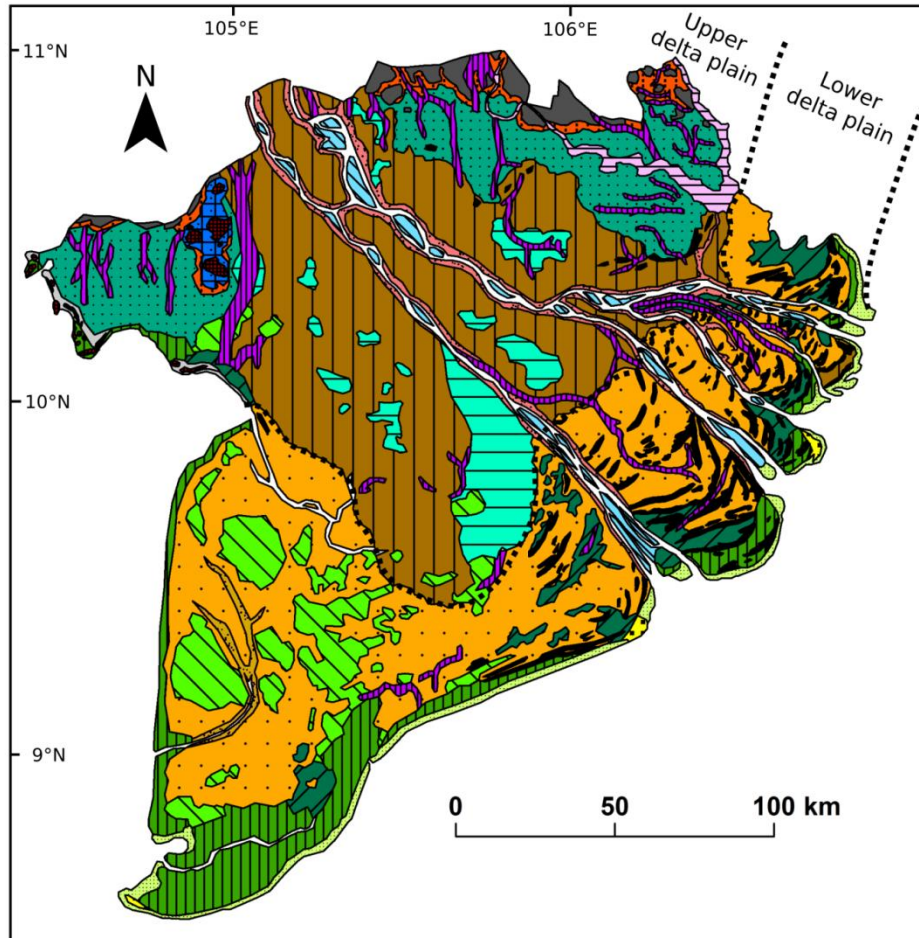

**Legend of geomorphological units**

|                                        |                                 |                              |
|----------------------------------------|---------------------------------|------------------------------|
| Abandoned channel belt                 | Coastal plain                   | Sand spit                    |
| Alluvial apron                         | Flood basin                     | Swamp                        |
| Back swamp                             | Flood plain                     | Tidal flat                   |
| Bank: natural levee and crevasse splay | Mangrove marsh                  | Late Pleistocene undef. dep. |
| Bank: tidal inlet                      | Marsh                           | Unknown                      |
| Basement rock                          | Relict beach ridge or sand dune | Weathered land               |
| Channel bar                            | Salt marsh                      |                              |

**Supplementary Figure 7 | Geomorphological map of the Vietnamese Mekong delta redrawn from Nguyen et al. 2000.** The upper and lower Holocene delta plain delineate the separation between the predominantly alluvial and coastal depositional environment.



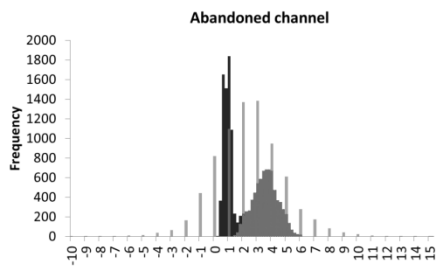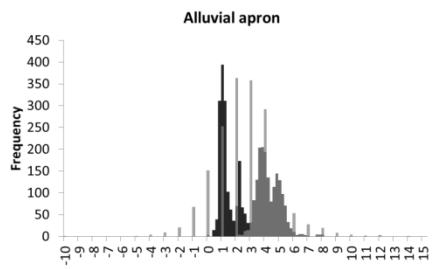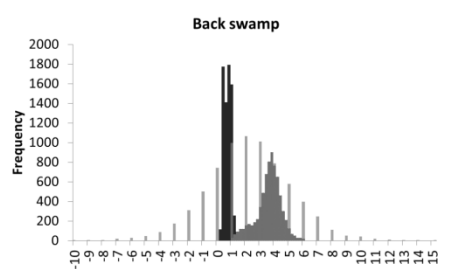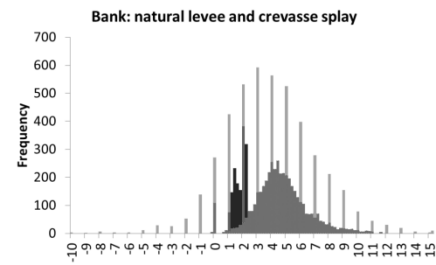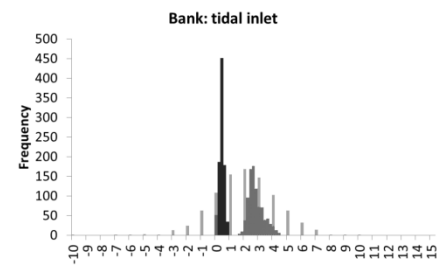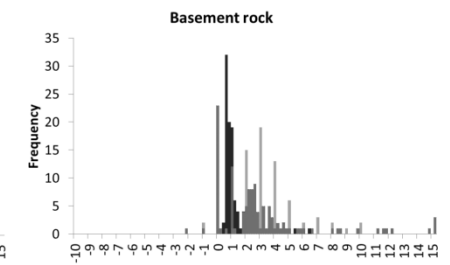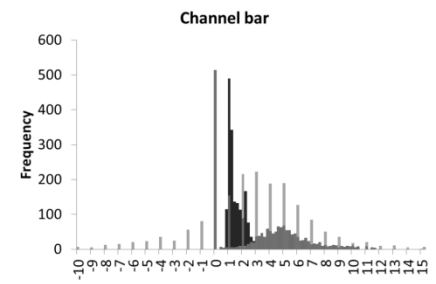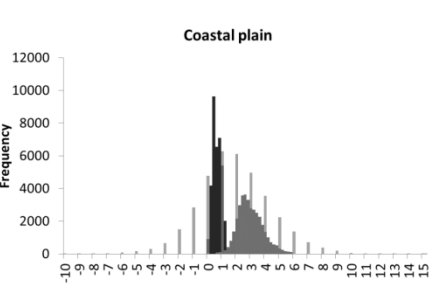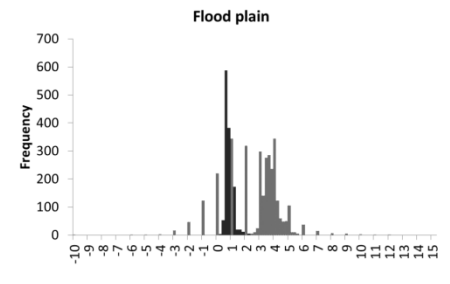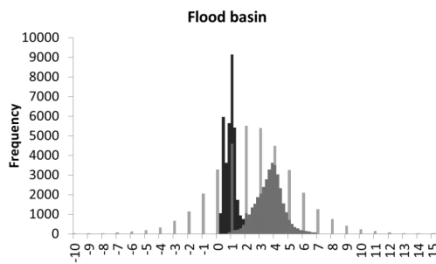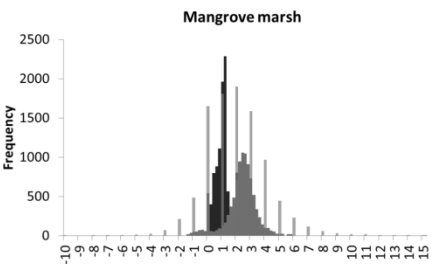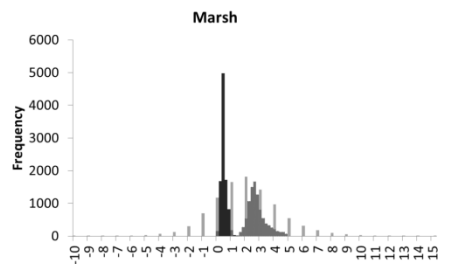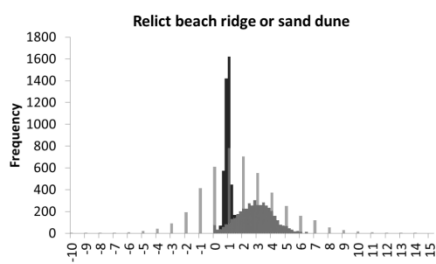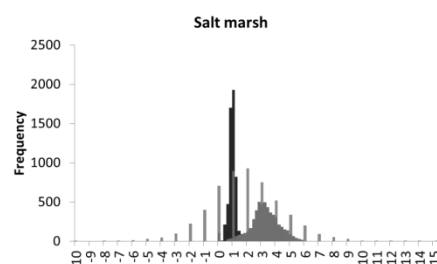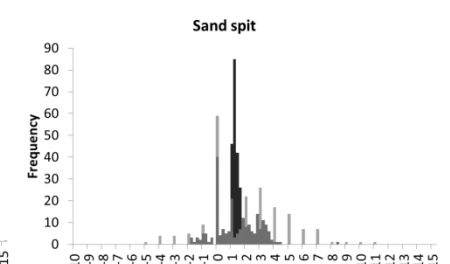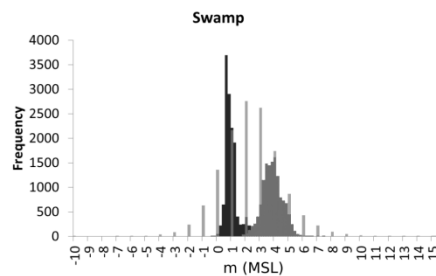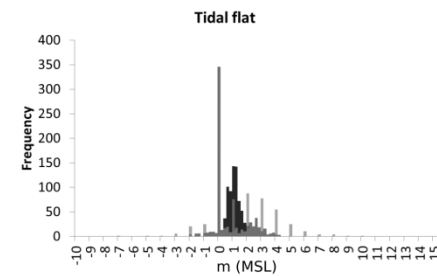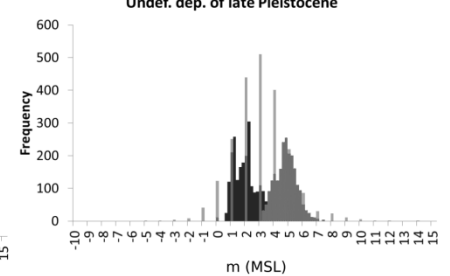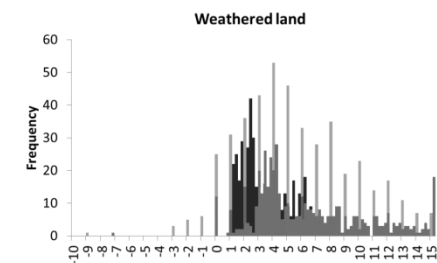

**Supplementary Figure 8]**  
**Frequency distributions of elevation of each geomorphological unit in the SRTM, MERIT and Topo DEM.**

**Legend**

- Topo DEM
- SRTM DEM
- MERIT DEM

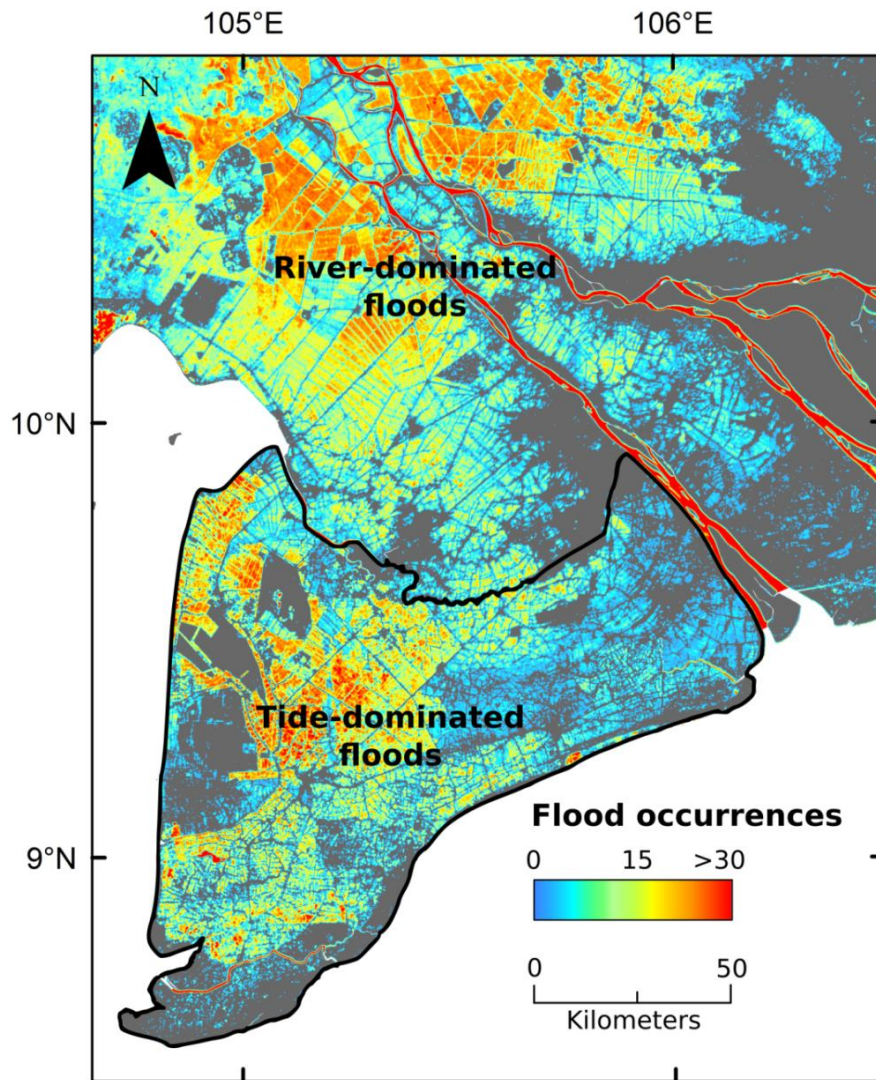

**Supplementary Figure 9 | Inundation occurrences in the Mekong delta in the period 2007-2011 derived from ENVISAT ASAR WSM data (Kuenzer et al. (2013)).** Floods in the upstream part of the Mekong delta are river-dominated and in the southern part tide-dominated. The black line demarcates the tide-dominated flood area used to compare inundation occurrences to elevation of the digital elevation models.

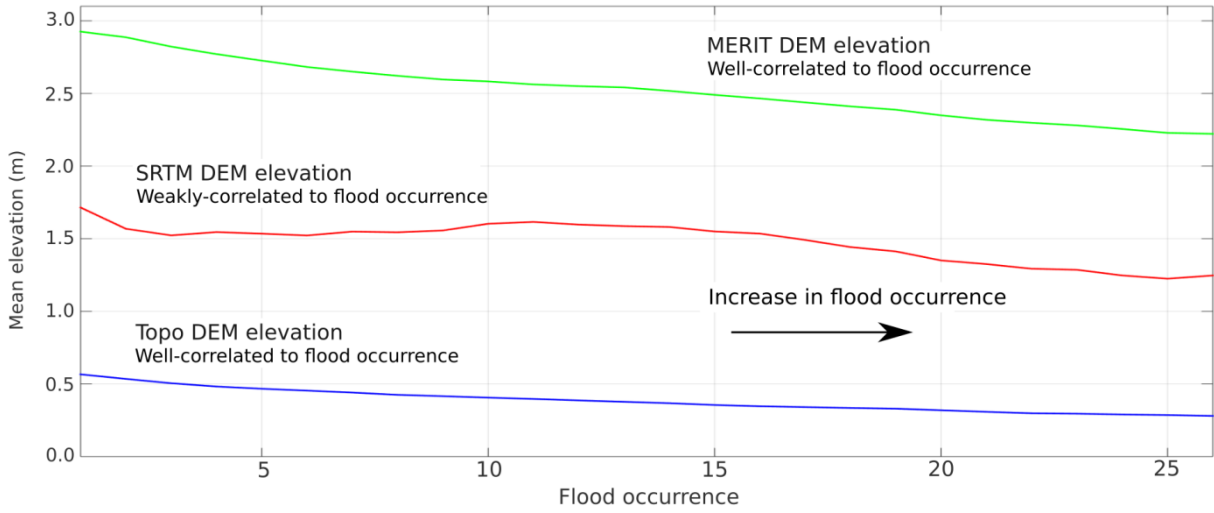

**Supplementary Figure 10 | Mean MERIT, SRTM and Topo DEM elevation arranged according to increasing tide-dominated flood occurrence in the southwestern part of the Mekong delta.** Flood occurrences were derived from satellite imagery for the period 2007-2011 (Supplementary Figure 9).

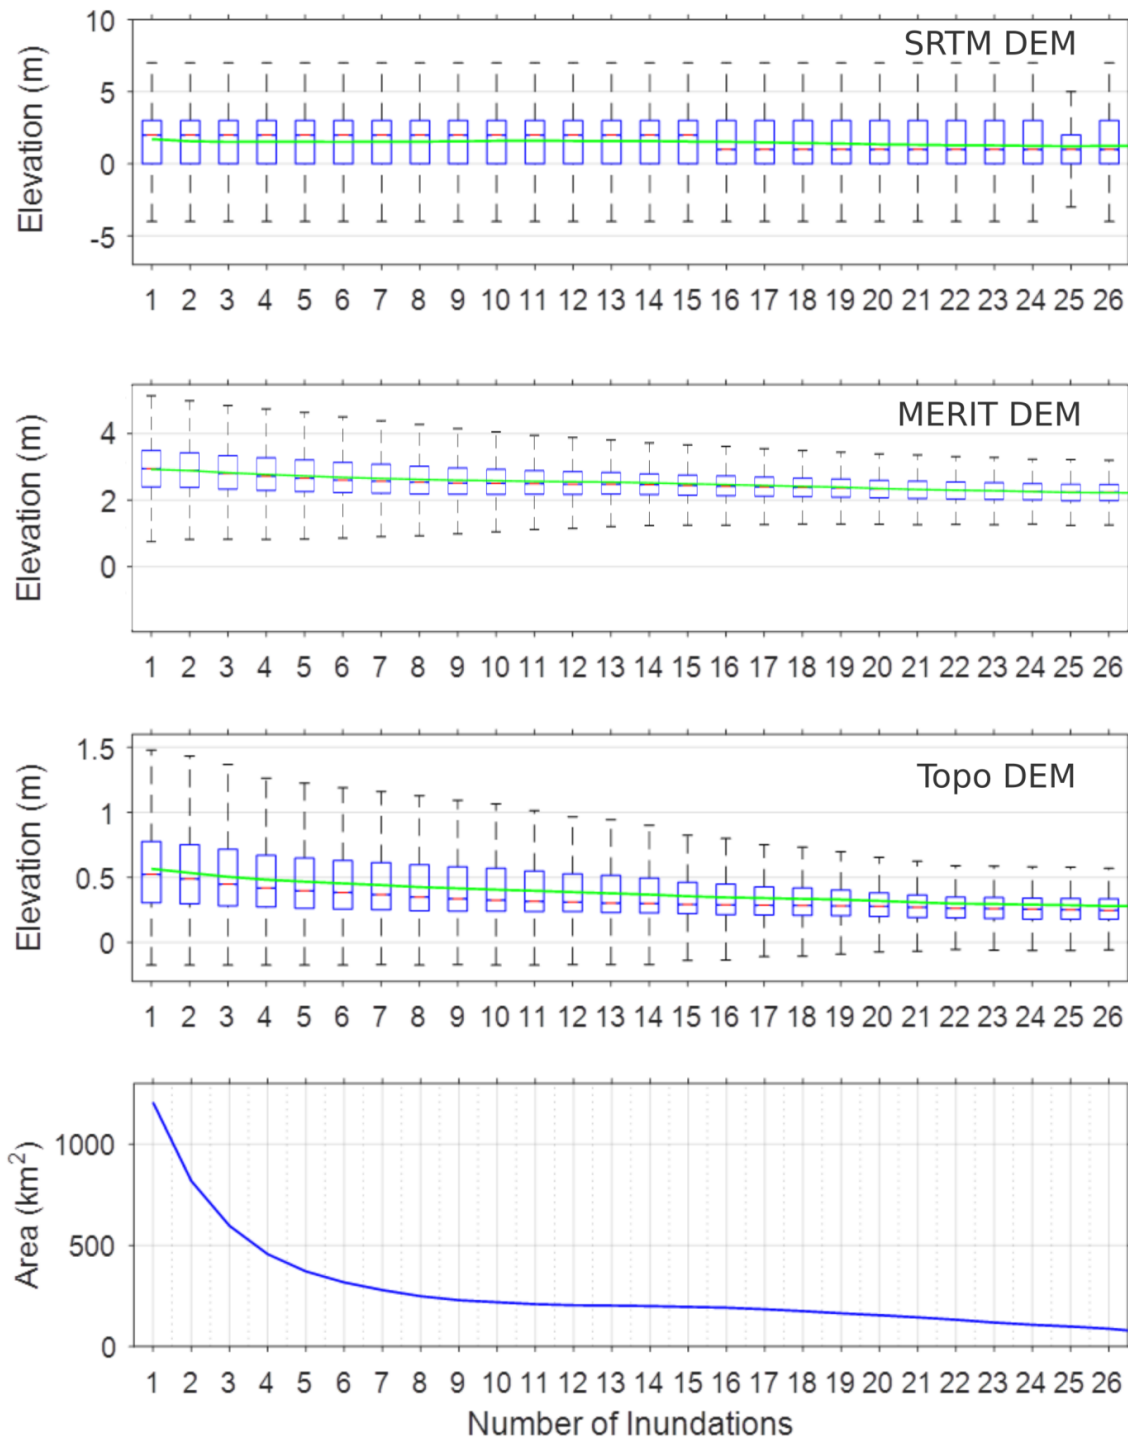

**Supplementary Figure 11 | Boxplots showing elevation of the SRTM, MERIT and Topo DEMs for areas with different inundation occurrences in the coastal zone of the Mekong delta.** Blue box indicates 25 and 75 percentile, red lines the median, black whiskers the maximum within the 1.5x interquartile range (IQR), green line the average. Extremes are not displayed. Inundation occurrences were derived from 128 satellite images by Kuenzer et al. (2013) between 2007 and 2013 (Supplementary Figure 9).



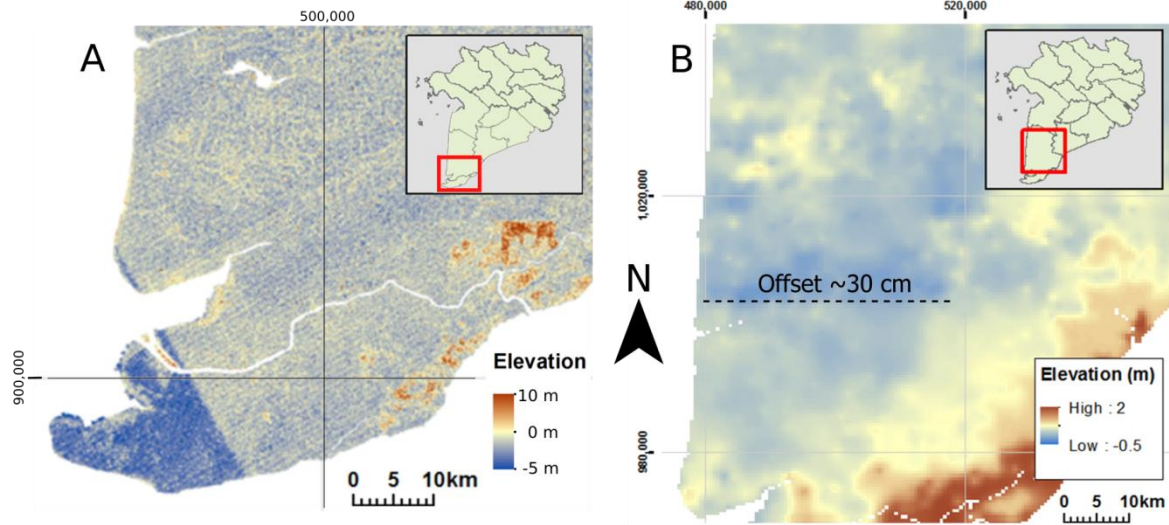

**Supplementary Figure 12 | Elevation anomalies present in the SRTM and the Topo DEM.** A) In the southwest corner of Ca Mau a sharp and unrealistic elevation change of multiple meters is visible. B) An abrupt elevation change of about ~30 cm is visible along a horizontal line in the Topo DEM.

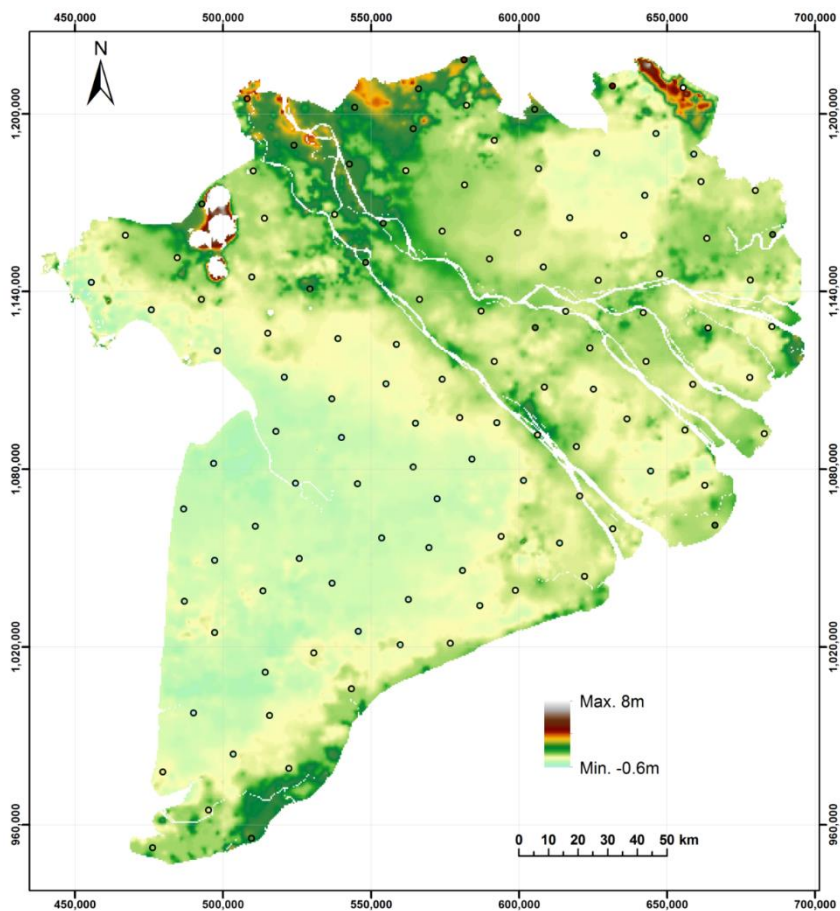

**Supplementary Figure 13 | Randomly selected control points used for interpolations validation of the different interpolated DEMs.** Colorbar is linear scaled.

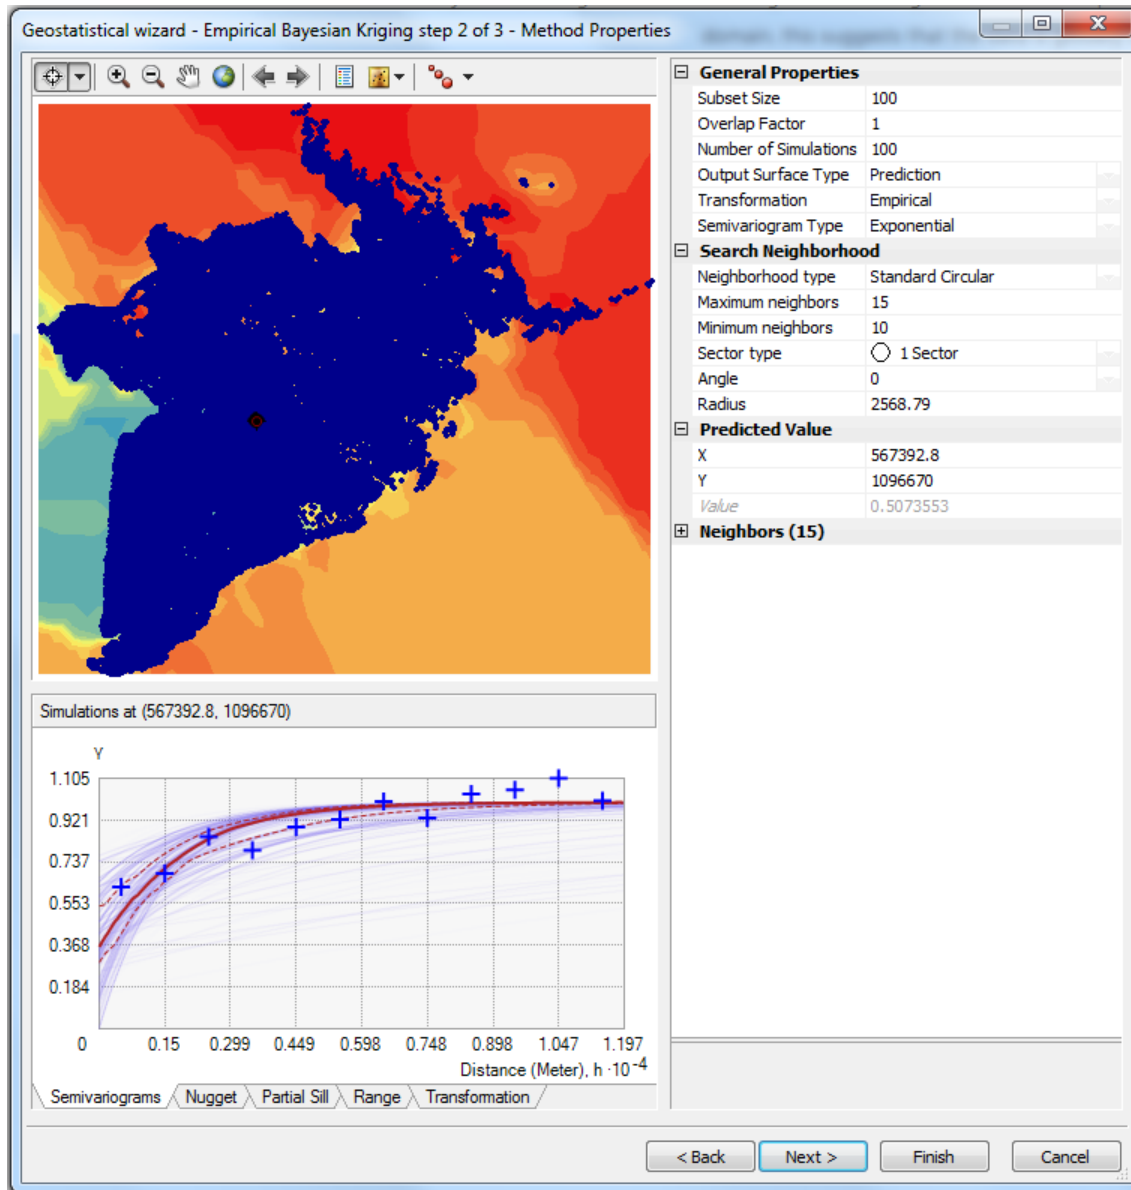

**Supplementary Figure 14 | Interpolations settings used to interpolate the elevation points to the Topo DEM.** The elevation points were interpolated using empirical bayesian kriging with an empirical data transformation and exponential variogram (ArcGIS version 10.3.1, geostatistical wizard).

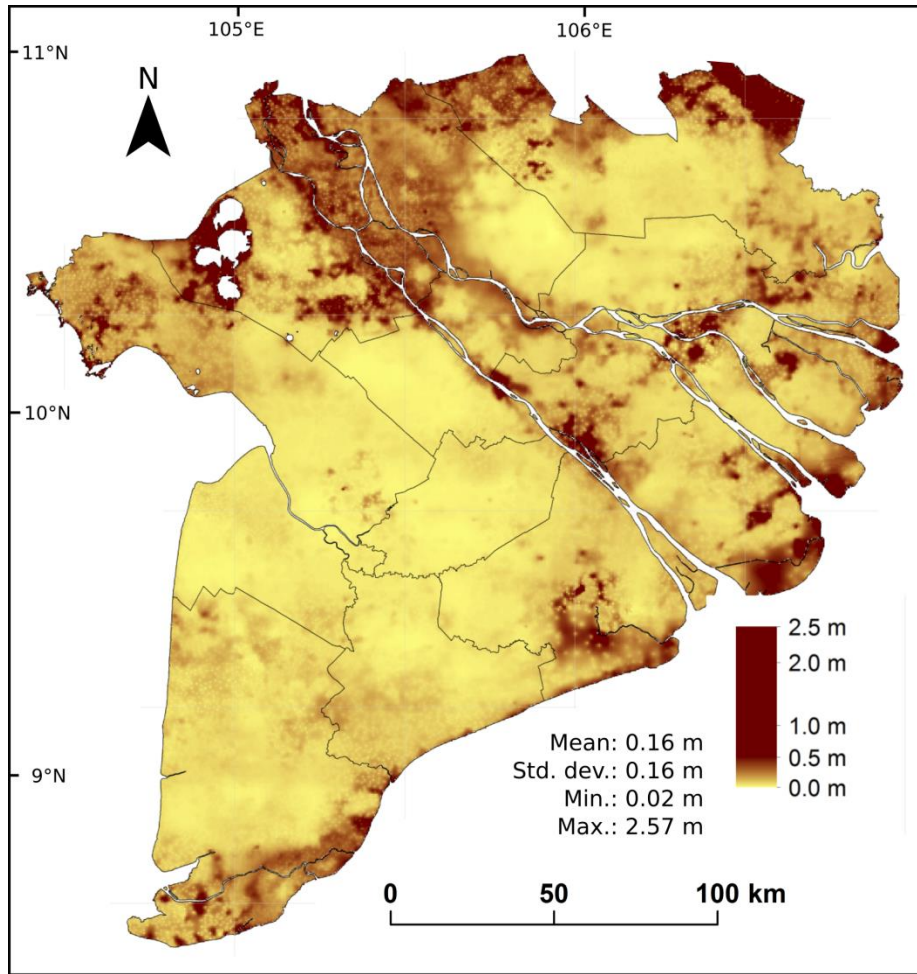

**Supplementary Figure 15 | Root mean square error (RMSE) map of the interpolated Topo DEM.** Mean RMSE and standard deviation are both 0.16 m. The RMSE increases with decreasing point density (Supplementary Figure 1).

## Supplementary Tables

**Supplementary Table 1 | Basic statistics of delta plain elevation.** Elevation for each province and the entire Mekong delta for the TOPO, SRTM and MERIT DEM. Bedrock outcrops, offshore islands and rivers are excluded.

| Province            | Topo DEM |          |          |        | SRTM DEM |          |          |        | MERIT DEM |          |          |        |
|---------------------|----------|----------|----------|--------|----------|----------|----------|--------|-----------|----------|----------|--------|
|                     | Mean (m) | Min. (m) | Max. (m) | SD (m) | Mean (m) | Min. (m) | Max. (m) | SD (m) | Mean (m)  | Min. (m) | Max. (m) | SD (m) |
| An Giang            | 1.42     | 0.5      | 7.8      | 0.8    | 3.3      | -51      | 88       | 3.4    | 3,8       | -13,0    | 84,1     | 2,1    |
| Bạc Liêu            | 0.50     | 0.1      | 2.0      | 0.3    | 2.0      | -21      | 28       | 2.3    | 2,9       | -3,6     | 9,6      | 0,6    |
| Bến Tre             | 0.95     | 0.5      | 2.6      | 0.3    | 2.6      | -59      | 63       | 2.8    | 3,1       | -7,5     | 39,5     | 1,4    |
| Cà Mau              | 0.59     | -0.2     | 2.6      | 0.5    | 2.3      | -25      | 71       | 2.4    | 2,4       | -11,4    | 15,8     | 0,9    |
| Cần Thơ             | 0.72     | 0.4      | 1.8      | 0.2    | 2.9      | -56      | 54       | 3.4    | 3,9       | -23,8    | 15,2     | 1,2    |
| Đồng Tháp           | 1.41     | 0.7      | 4.0      | 0.6    | 3.7      | -34      | 84       | 3.0    | 4,4       | -9,2     | 24,5     | 1,3    |
| Hậu Giang           | 0.38     | 0.1      | 1.0      | 0.2    | 1.9      | -82      | 53       | 3.2    | 3,4       | -12,6    | 12,9     | 0,7    |
| Kiên Giang          | 0.39     | -0.5     | 5.1      | 0.3    | 2.5      | -60      | 107      | 2.6    | 3,1       | -14,6    | 57,0     | 1,0    |
| Long An             | 1.07     | 0.2      | 7.2      | 0.7    | 2.4      | -46      | 51       | 2.3    | 3,9       | -18,0    | 23,5     | 0,9    |
| Sóc Trăng           | 0.68     | 0.2      | 2.5      | 0.3    | 2.0      | -42      | 42       | 3.1    | 3,5       | -7,2     | 17,5     | 1,0    |
| Tiền Giang          | 0.85     | 0.3      | 1.9      | 0.2    | 2.8      | -44      | 40       | 2.2    | 3,6       | -3,9     | 14,1     | 1,0    |
| Trà Vinh            | 0.79     | 0.3      | 2.7      | 0.2    | 2.5      | -29      | 37       | 2.6    | 2,8       | -8,0     | 16,9     | 1,1    |
| Vĩnh Long           | 0.94     | 0.5      | 2.1      | 0.2    | 2.1      | -31      | 40       | 2.8    | 2,6       | -6,1     | 16,4     | 1,1    |
| <b>Mekong delta</b> | 0.82     | -0.5     | 7.8      | 0.6    | 2.6      | -82      | 107      | 2.8    | 3,3       | -10,7    | 26,7     | 1,1    |

**Supplementary Table 2 | List of national benchmarks used for absolute elevation validation.** Coordinates are in VN-2000. The national benchmark system in Vietnam is governed by the Department of Survey and Mapping of Vietnam, part of Vietnam's Ministry of Natural Resources and Environment.

| National benchmark number | Name of benchmark point | X-coordinate | Y-coordinate | Elevation (m) |
|---------------------------|-------------------------|--------------|--------------|---------------|
| 657415                    | Kênh Nam Lộ             | 627507       | 1176084      | 0.660         |
| 658439                    | Thuận Lợi               | 669678       | 1158808      | 0.321         |
| 693404                    | Chắc Tưng               | 612416       | 1054971      | 1.134         |
| 693518                    | Tân Quy A               | 619041       | 1063319      | -0.285        |
| 657423                    | Kênh Kè                 | 630810       | 1174045      | -0.064        |
| 657457                    | Tấn Đức                 | 663288       | 1167284      | 0.375         |
| 657417                    | Ấp 2 Thuỷ Tây           | 620028       | 1175109      | 0.153         |
| 681527                    | Nô Công                 | 658229       | 1081230      | 1.262         |
| 681535                    | Sóc Giục                | 657528       | 1077655      | 0.874         |
| 681536                    | ấp Chợ                  | 661848       | 1076181      | 1.120         |
| 681529                    | Chợ Tập Sơn             | 638001       | 1076824      | 1.492         |
| 681524                    | Chòm Chuối              | 641702       | 1078533      | 0.709         |
| 681431                    | ấp Tân Đại              | 630465       | 1089604      | 0.960         |
| 681458                    | Ngãi Hoà                | 635855       | 1084992      | 1.196         |
| 669571                    | Thạnh An                | 614592       | 1120402      | 0.682         |
| 669542                    | An Phú A                | 611432       | 1124804      | 0.858         |
| 668526                    | Kinh Mới                | 591426       | 1116280      | 0.827         |
| 668528                    | Vườn Ba Ngoặc           | 586585       | 1114258      | 1.330         |
| 680413                    | Nhà anh Minh            | 580295       | 1100890      | 0.928         |
| 680436                    | Trường Khánh            | 582986       | 1094121      | 0.977         |
| 692401                    | ấp 8                    | 560201       | 1068475      | 0.301         |
| 692402                    | ấp 4                    | 563582       | 1067544      | 0.200         |
| 704408                    | Trường Học              | 574047       | 1028463      | 0.768         |



|        |                    |        |         |        |
|--------|--------------------|--------|---------|--------|
| 704417 | ấp Kinh Tế Mới     | 579479 | 1024004 | 1.534  |
| 703407 | Khóm IV            | 517556 | 1017633 | 0.699  |
| 703416 | Khóm 7             | 521765 | 1014021 | 0.998  |
| 679434 | Hoà Thạnh          | 521116 | 1090743 | 0.468  |
| 679506 | Phước Hoà          | 516503 | 1103392 | 0.444  |
| 666407 | Kinh 1             | 461989 | 1139831 | 0.656  |
| 666410 | Kinh Hạt           | 471193 | 1136886 | 0.712  |
| 643437 | Mỹ Phó             | 517423 | 1180234 | 2.259  |
| 655413 | Mỹ Thiện           | 521838 | 1176403 | 3.515  |
| 655450 | Bình An II         | 536672 | 1159292 | 2.673  |
| 655455 | Phú An             | 533075 | 1154965 | 2.229  |
| 655499 | Phường Mỹ Thới     | 550364 | 1144340 | 1.954  |
| 667502 | Khóm Thới Thạnh    | 552205 | 1140501 | 1.242  |
| 668581 | Khóm 4             | 571832 | 1137922 | 1.042  |
| 668590 | Long Hội           | 572846 | 1135765 | 1.297  |
| 655427 | ấp 1               | 546857 | 1170395 | 1.711  |
| 693512 | Trà Tro A          | 641941 | 1069227 | 0.276  |
| 667431 | Tân Lợi            | 545830 | 1125843 | 0.364  |
| 667433 | Phụng Thạnh        | 537481 | 1124494 | -0.534 |
| 656454 | ẤP 4               | 578346 | 1160047 | -0.564 |
| 656463 | Hoà Dân            | 577710 | 1158078 | -0.381 |
| 657452 | Bình Tây           | 658548 | 1170595 | 0.122  |
| 657453 | Bình Đông          | 659546 | 1170372 | 0.234  |
| 645440 | Hóc Thơm 2         | 649407 | 1201527 | -0.279 |
| 645465 | ẤP Thơm 2          | 648320 | 1200071 | -0.526 |
| 681533 | Long Trường        | 646314 | 1075599 | -0.125 |
| 681502 | Nghĩa Địa          | 661187 | 1069833 | 0.892  |
| 655431 | Mỹ Phước           | 517429 | 1171578 | 0.212  |
| 655475 | Vĩnh Quới          | 525743 | 1168909 | 0.722  |
| 657556 | ẤP Thạnh Hưng      | 642161 | 1149011 | -0.223 |
| 657447 | ẤP 3               | 639379 | 1151656 | 0.403  |
| 680576 | Phú Thành B        | 551205 | 1073548 | 0.273  |
| 692502 | Giồng Chùa         | 547642 | 1067170 | 1.236  |
| 645416 | Kênh Rừng Sến      | 658489 | 1204078 | 1.768  |
| 645428 | ẤP 3 Nghĩa Trang   | 642902 | 1203834 | 0.295  |
| 645431 | Hậu Hoà            | 657106 | 1203456 | 2.567  |
| 703493 | ẤP Thanh Hải       | 547450 | 1003072 | 0.861  |
| 704411 | Cái Tràm A2-1      | 571888 | 1026933 | 0.239  |
| 704409 | Hàng Bàn           | 567153 | 1028257 | 0.224  |
| 703497 | Kênh Ba            | 548363 | 1001048 | 0.905  |
| 658407 | ẤP Phước Hậu Ngoài | 675906 | 1176178 | 0.49   |
| 658414 | ẤP Thuận Tây       | 675337 | 1169947 | -0.237 |
| 679442 | Hoà Lợi            | 545476 | 1085891 | -1.172 |
| 680523 | ẤP Tân Thành       | 584768 | 1073450 | -0.305 |
| 646405 | Tân Bửu            | 586175 | 1181420 | 0.153  |
| II-34  | Nghĩa Trang        | 579247 | 1177640 | -0.266 |

**Supplementary Table 3 | Elevation statistics for each geomorphological unit based on the Topo DEM and the geomorphological map of Nguyen et al., 2000 (Supplementary Figure 7).**

| <b>Geomorphological unit</b>           | <b>Mean (m)</b> | <b>SD (m)</b> | <b>Area (km<sup>2</sup>)</b> |
|----------------------------------------|-----------------|---------------|------------------------------|
| Abandoned channel belt                 | 0.91            | 0.45          | 1699                         |
| Alluvial apron                         | 1.38            | 0.77          | 401                          |
| Back swamp                             | 0.66            | 0.33          | 1614                         |
| Bank: natural levee and crevasse splay | 1.38            | 0.55          | 1034                         |
| Bank: Tidal inlet                      | 0.28            | 0.16          | 200                          |
| Basement rock                          | 1.20            | 1.19          | 24                           |
| Channel bar                            | 1.41            | 0.60          | 408                          |
| Coastal plain                          | 0.53            | 0.32          | 7877                         |
| Flood basin                            | 0.85            | 0.46          | 8205                         |
| Flood plain                            | 0.74            | 0.29          | 339                          |
| Mangrove marsh                         | 0.97            | 0.48          | 2123                         |
| Marsh                                  | 0.34            | 0.18          | 2085                         |
| Relict beach ridge or sand dune        | 0.84            | 0.28          | 953                          |
| Salt marsh                             | 0.83            | 0.23          | 1164                         |
| Sand spit                              | 1.14            | 0.20          | 45                           |
| Swamp                                  | 0.85            | 0.50          | 3006                         |
| Tidal Flat                             | 0.99            | 0.42          | 151                          |
| Undef. dep. of late Pleistocene age    | 1.84            | 0.76          | 511                          |
| Weathered land                         | 3.27            | 1.70          | 110                          |

**Supplementary Table 4 | Elevation statistics for each geomorphological unit based on the SRTM elevation model and the geomorphological map of Nguyen et al., 2000 (Supplementary Figure 7).**

| <b>Geomorphological unit</b>           | <b>Mean (m)</b> | <b>SD (m)</b> | <b>Area (km<sup>2</sup>)</b> |
|----------------------------------------|-----------------|---------------|------------------------------|
| Abandoned channel belt                 | 2.65            | 2.38          | 1699                         |
| Alluvial apron                         | 2.84            | 2.09          | 401                          |
| Back swamp                             | 2.44            | 3.00          | 1614                         |
| Bank: natural levee and crevasse splay | 4.11            | 3.31          | 1034                         |
| Bank: Tidal inlet                      | 2.29            | 2.26          | 200                          |
| Basement rock                          | 4.49            | 4.50          | 24                           |
| Channel bar                            | 3.17            | 4.11          | 408                          |
| Coastal plain                          | 2.15            | 2.62          | 7877                         |
| Flood basin                            | 2.83            | 3.02          | 8205                         |
| Flood plain                            | 2.15            | 2.41          | 339                          |
| Mangrove marsh                         | 2.35            | 2.22          | 2007                         |
| Marsh                                  | 2.28            | 2.53          | 2085                         |
| Relict beach ridge or sand dune        | 2.19            | 2.83          | 953                          |
| Salt marsh                             | 2.14            | 2.66          | 1164                         |
| Sand spit                              | 2.67            | 2.78          | 35                           |
| Swamp                                  | 2.57            | 2.09          | 3006                         |
| Tidal Flat                             | 2.20            | 2.26          | 104                          |
| Undef. dep. of late Pleistocene age    | 3.11            | 1.81          | 511                          |
| Weathered land                         | 6.37            | 5.19          | 110                          |

**Supplementary Table 5 | Elevation statistics for each geomorphological unit based on the MERIT elevation model and the geomorphological map of Nguyen et al., 2000 (Supplementary Figure 7).**

| <b>Geomorphological unit</b>           | <b>Mean (m)</b> | <b>SD (m)</b> | <b>Area (km<sup>2</sup>)</b> |
|----------------------------------------|-----------------|---------------|------------------------------|
| Abandoned channel belt                 | 3.48            | 0.96          | 1699                         |
| Alluvial apron                         | 4.19            | 1.02          | 401                          |
| Back swamp                             | 3.49            | 0.91          | 1614                         |
| Bank: natural levee and crevasse splay | 4.67            | 1.87          | 1034                         |
| Bank: Tidal inlet                      | 2.68            | 0.54          | 200                          |
| Basement rock                          | 4.17            | 4.20          | 24                           |
| Channel bar                            | 5.06            | 2.39          | 408                          |
| Coastal plain                          | 2.87            | 0.94          | 7877                         |
| Flood basin                            | 3.54            | 1.03          | 8205                         |
| Flood plain                            | 3.66            | 0.57          | 339                          |
| Mangrove marsh                         | 2.29            | 1.13          | 2007                         |
| Marsh                                  | 2.69            | 0.70          | 2085                         |
| Relict beach ridge or sand dune        | 2.78            | 1.24          | 953                          |
| Salt marsh                             | 3.13            | 1.04          | 1164                         |
| Sand spit                              | 1.58            | 1.59          | 35                           |
| Swamp                                  | 3.73            | 0.83          | 3006                         |
| Tidal Flat                             | 1.47            | 1.71          | 104                          |
| Undef. dep. of late Pleistocene age    | 4.67            | 0.79          | 511                          |
| Weathered land                         | 6.87            | 4.77          | 110                          |

**Supplementary Table 6 | Comparison of the validations statistics of different interpolation methods tested to interpolate the topographical elevation points.** Interpolation was done using the 3D analyst and geostatistical analyst toolbox in ArcMAP 10.3.1. RMSE = root mean squared error, MD = mean deviation, MAD = mean absolute deviation, std.dev. = standard deviation from mean absolute deviation. A positive deviation means an overprediction of the control point elevation. If cell size is not given, the cell size is 500m x 500m. Only settings which deviate from the default settings are indicated. In all cases, by default the 12 nearest points at a variable search radius are used for interpolation.

| Interpolation method                            | Settings                                                                               | RMSE (m) | MD (m) | MAD (m)     |
|-------------------------------------------------|----------------------------------------------------------------------------------------|----------|--------|-------------|
| <b>Inverse distance weighting (IDW)</b>         | Power: 0.5 Cell size: 1km x 1km                                                        | 0.50     | -0.05  | 0.25        |
|                                                 | Power: 1 Cell size: 1km x 1km                                                          | 0.50     | -0.06  | 0.25        |
|                                                 | Power: 2 Cell size: 1km x 1km                                                          | 0.51     | -0.06  | 0.25        |
|                                                 | Power: 3 Cell size: 1km x 1km                                                          | 0.53     | -0.06  | 0.25        |
|                                                 | Power: 0.5                                                                             | 0.48     | -0.05  | 0.24        |
|                                                 | Power: 1                                                                               | 0.48     | -0.05  | 0.24        |
|                                                 | Power: 2                                                                               | 0.49     | -0.06  | 0.23        |
|                                                 | Power: 3                                                                               | 0.51     | -0.06  | 0.23        |
| <b>Ordinary Kriging (3D spatial analyst)</b>    | Spherical model                                                                        | 0.53     | -0.06  | 0.24        |
|                                                 | Circular model                                                                         | 0.53     | -0.06  | 0.24        |
|                                                 | Exponential model                                                                      | 0.53     | -0.06  | 0.24        |
|                                                 | Gaussian model                                                                         | 0.47     | -0.05  | 0.24        |
|                                                 | Linear model                                                                           | 0.53     | -0.06  | 0.24        |
| <b>Ordinary Kriging (Geostatistical Wizard)</b> | Spherical model                                                                        | 0.50     | -0.05  | 0.24        |
|                                                 | Number of lags: 20, Lag size: 900m                                                     |          |        |             |
|                                                 | Gaussian model                                                                         | 0.50     | -0.05  | 0.24        |
|                                                 | Number of lags: 20, Lag size: 900m                                                     |          |        |             |
|                                                 | Exponential model                                                                      | 0.50     | -0.05  | 0.24        |
|                                                 | Number of lags: 20, Lag size: 900m                                                     |          |        |             |
| <b>Empirical Bayesian Kriging</b>               | No data transformation, Power model                                                    | 0.50     | -0.04  | 0.24        |
|                                                 | <b>Empirical data transformation, Exponential model</b>                                | 0.52     | -0.07  | <b>0.22</b> |
| <b>Natural Neighbor</b>                         | -                                                                                      | 0.52     | -0.06  | 0.25        |
| <b>Spline</b>                                   | Tension type spline                                                                    | 0.55     | -0.07  | 0.26        |
| <b>Topo to Raster (ANUDEM)</b>                  | Input type: Point Elevation, No drainage enforcement, Primary type of input data: Spot | 0.52     | -0.07  | 0.24        |
|                                                 | Input type: Point Elevation, Drainage enforcement, Primary type of input data: Spot    | 0.53     | -0.07  | 0.24        |



**Supplementary Table 7 | Area and population numbers of the provinces in the Vietnamese Mekong delta (VMD).**  
 Total area and provincial population data from the General Statistics Office of Vietnam, available at [www.gso.gov.vn](http://www.gso.gov.vn).  
 Area Mekong delta plain excludes bedrock, islands and rivers.

| Province          | Area (km <sup>2</sup> ) |                                        |                         | Population in 2016 (persons) | Population density in 2016 (persons/km <sup>2</sup> ) |
|-------------------|-------------------------|----------------------------------------|-------------------------|------------------------------|-------------------------------------------------------|
|                   | Total area in 2016      | Main features excluded from total area | Mekong delta plain only |                              |                                                       |
| An Giang          | 3 537                   | Bedrock (202 km <sup>2</sup> )         | 3 213                   | 2 159 900                    | 611                                                   |
| Bạc Liêu          | 2 669                   | -                                      | 2 465                   | 886 200                      | 332                                                   |
| Bến Tre           | 2 395                   | Rivers                                 | 2 068                   | 1 265 200                    | 528                                                   |
| Cà Mau            | 5 221                   | Rivers                                 | 5 138                   | 1 222 600                    | 234                                                   |
| Cần Thơ           | 1 439                   | -                                      | 1 400                   | 1 257 900                    | 874                                                   |
| Đồng Tháp         | 3 384                   | Rivers                                 | 3 242                   | 1 687 300                    | 499                                                   |
| Hậu Giang         | 1 622                   | -                                      | 1 622                   | 772 500                      | 476                                                   |
| Kiên Giang        | 6 349                   | Islands, bedrock (35 km <sup>2</sup> ) | 5 607                   | 1 776 700                    | 280                                                   |
| Long An           | 4 495                   | -                                      | 4 458                   | 1 490 600                    | 332                                                   |
| Sóc Trăng         | 3 312                   | Rivers                                 | 3 148                   | 1 312 500                    | 396                                                   |
| Tiền Giang        | 2 511                   | Rivers                                 | 2 265                   | 1 740 200                    | 693                                                   |
| Trà Vinh          | 2 358                   | Rivers                                 | 2 110                   | 1 040 500                    | 441                                                   |
| Vĩnh Long         | 1 526                   | Rivers                                 | 1 446                   | 1 048 600                    | 687                                                   |
| <b>Entire VMD</b> | <b>40 816</b>           | <b>Rivers, islands</b>                 | <b>38 181</b>           | <b>17 660 700</b>            | <b>433</b>                                            |

## **Supplementary Discussion**

### **Supplementary Discussion 1**

The SRTM and MERIT DEMS and the Topo DEM all contain an elevation anomaly which is likely the result of a measurement or data processing error. In the SW corner of the Ca Mau peninsula, an elevation anomaly is visible in the SRTM DEM (Supplementary Figure 12A) (which translates through to the MERIT DEM). Here, elevation values abruptly change with a sharp, geomorphological unrealistic, transition to several meters below sea level, also clearly visible in the elevation profile (main manuscript Figure 3, profile B-B'). The Topo DEM also contains an elevation inconsistency. In the southern part of the delta along a horizontal line the elevation abruptly changes ~30 cm (Supplementary Figure 12B). This sudden change in elevation is also present in the topographical elevation point dataset on which the Topo DEM is based and may stem from a measurement error or data processing error. It seems to be a local error, as the systematic offset is not present in the eastern part of the delta plain on the same latitude.

## **Supplementary Methods**

### **Supplementary Methods 1**

A range of interpolation methods available in ArcMAP (3D analyst and geostatistical analyst toolbox in ArcMAP V10.3.1.) were used to create different interpolations of the topographical elevation points (Supplementary Table 6). The quality of the interpolated DEMs was tested by a statistical comparison using 120 randomly selected control points (Supplementary Figure 13), which were excluded during the interpolation process. The control points were randomly selected within a squared raster to ensure even distribution over the delta. The DEM interpolated using empirical bayesian kriging with an empirical data transformation and exponential model provided the smallest mean average deviation with the control points (Supplementary Table 6) and contained no visible abnormal elevation artifacts. It was therefore selected as final DEM, presented as Topo DEM in this study. See Supplementary Figure 14 for used settings in Arcmap.

## Supplementary References

Kuenzer, C., Guo, H., Huth, J., Leinenkugel, P., Li, X., Dech, S., 2013. Flood mapping and flood dynamics of the mekong delta: ENVISAT-ASAR-WSM based time series analyses. *Remote Sens.* 5, 687–715.  
doi:10.3390/rs5020687

Nguyen, V.L., Ta, T.K.O., Tateishi, M., 2000. Late Holocene depositional environments and coastal evolution of the Mekong River Delta, Southern Vietnam. *J. Asian Earth Sci.* 18, 427–439.  
doi:10.1016/S1367-9120(99)00076-0
